# Supplementary material
Source: PubMed Central journal article supplement (PMC2837136)

# Supplemental Figure 1

4 hour

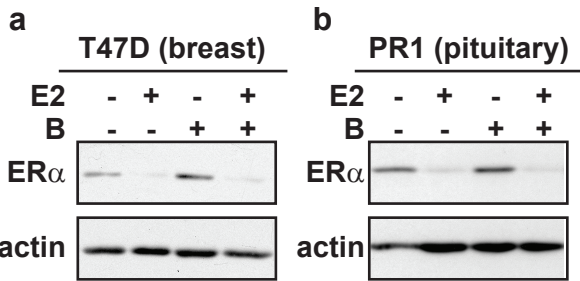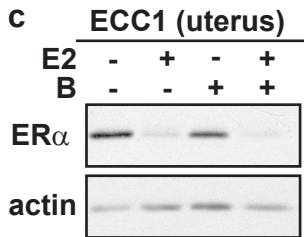

24 hour

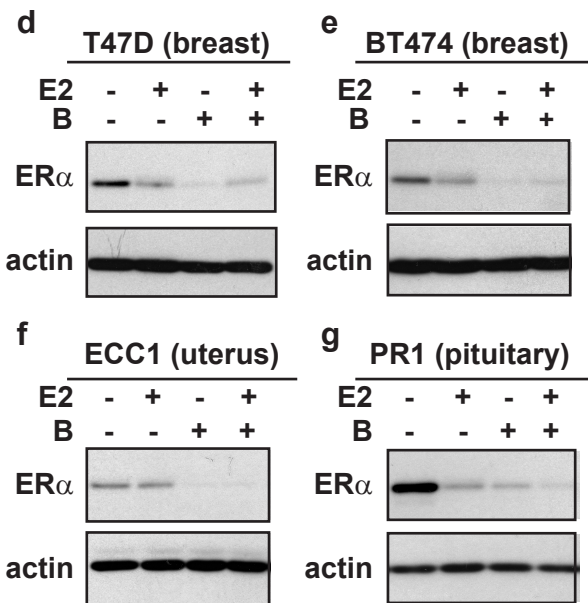

Supplement: NIHMS155230-supplement-1.pdf [file NIHMS155230-supplement-1.pdf]
